# Supplementary material
Source: publisher site journal article supplement (https://www.spandidos-publications.com/3135/downloadSupplementary)
Supplement: Supplementary file 1 [file downloadSupplementary]

## Sheet: Sheet2
Table SXVI. Kyoto Encyclopedia of Genes and Genomes analysis of the differentially expressed mRNA involved in the long non-coding RNA -associated competing endogenous RNA network.
Category	Term	Count	%	P-value	Genes	List Total	Pop Hits	Pop Total	Fold Enrichment	Bonferroni	Benjamini	False discovery rate
KEGG_PATHWAY	rno05321:Inflammatory bowel disease (IBD)	3	0.0453241	0.0345151	IL12RB1, RT1-DB1, RT1-BA	36	65	7749	9.93462	0.966863	0.966863	32.1333
KEGG_PATHWAY	rno05332:Graft-versus-host disease	3	0.0453241	0.0354943	RT1-DB1, RT1-BA, RT1-A3	36	66	7749	9.78409	0.969969	0.826707	32.8891
KEGG_PATHWAY	rno00980:Metabolism of xenobiotics by cytochrome P450	3	0.0453241	0.0395181	GSTM1, CYP2F4, EPHX1	36	70	7749	9.225	0.979981	0.728471	35.915
KEGG_PATHWAY	rno05330:Allograft rejection	3	0.0453241	0.0395181	RT1-DB1, RT1-BA, RT1-A3	36	70	7749	9.225	0.979981	0.728471	35.915
KEGG_PATHWAY	rno04514:Cell adhesion molecules (CAMs)	4	0.0604321	0.0418598	RT1-DB1, CLDN22, RT1-BA, RT1-A3	36	172	7749	5.00581	0.984201	0.645469	37.6183
KEGG_PATHWAY	rno04940:Type I diabetes mellitus	3	0.0453241	0.0458623	RT1-DB1, RT1-BA, RT1-A3	36	76	7749	8.49671	0.989474	0.597788	40.4345
KEGG_PATHWAY	rno05320:Autoimmune thyroid disease	3	0.0453241	0.0469542	RT1-DB1, RT1-BA, RT1-A3	36	77	7749	8.38636	0.99058	0.540443	41.1825
KEGG_PATHWAY	rno05416:Viral myocarditis	3	0.0453241	0.0619873	RT1-DB1, RT1-BA, RT1-A3	36	90	7749	7.175	0.997985	0.588005	50.648
KEGG_PATHWAY	rno05204:Chemical carcinogenesis	3	0.0453241	0.0632047	GSTM1, EPHX1, CYP2C11	36	91	7749	7.09615	0.998224	0.546902	51.3502
KEGG_PATHWAY	rno04612:Antigen processing and presentation	3	0.0453241	0.070678	RT1-DB1, RT1-BA, RT1-A3	36	97	7749	6.65722	0.999183	0.54616	55.4658
KEGG_PATHWAY	rno05168:Herpes simplex infection	4	0.0604321	0.0728223	RT1-DB1, ARNTL, RT1-BA, RT1-A3	36	216	7749	3.98611	0.999347	0.519735	56.5868
